# **New insights into the allosteric effects of CO<sub>2</sub> and bicarbonate on crocodilian hemoglobin**

Naim M. Bautista<sup>1</sup>, Hans Malte<sup>1</sup>, Chandrasekhar Natarajan<sup>2</sup>, Tobias Wang<sup>1</sup>, Jay F. Storz<sup>2</sup> and Angela Fago<sup>1\*</sup>

<sup>1</sup>Department of Biology, Aarhus University, 8000 Aarhus C, Denmark

<sup>2</sup>School of Biological Sciences, University of Nebraska, Lincoln, Nebraska 68588, USA

## **Corresponding author:**

\*Angela Fago

Department of Biology, Zoophysiology, Aarhus University, C. F. Møllers Alle 3, 8000 Aarhus C, Denmark

Email: [angela.fago@bio.au.dk](mailto:angela.fago@bio.au.dk)

## **Orcid #'s:**

Naim M. Bautista: # 0000-0003-0634-0842

Hans Malte: # 0000-0003-3460-1819

Chandrasekhar Natarajan: # 0000-0002-4841-0426

Tobias Wang: # 0000-0002-4350-3682

Jay F. Storz: # 0000-0001-5448-7924

Angela Fago: # 0000-0001-7315-2628

## Abstract

Crocodylians are unique among vertebrates in that their hemoglobin (Hb) O<sub>2</sub> binding is allosterically regulated by bicarbonate, which forms in the red blood cell upon hydration of CO<sub>2</sub>. Although known for decades, this remarkable mode of allosteric control has not yet been experimentally verified with direct evidence of bicarbonate binding to crocodilian Hb, probably because of confounding CO<sub>2</sub>-mediated effects. Here we provide the first quantitative analysis of the separate allosteric effects of CO<sub>2</sub> and bicarbonate on Hb of the spectacled caiman (*Caiman crocodilus*). Using thin-layer gas diffusion chamber and Tucker chamber techniques, we demonstrate that both CO<sub>2</sub> and bicarbonate bind to Hb with high affinity and strongly decrease Hb-O<sub>2</sub> saturation, and propose that both effectors bind to an unidentified positively charged site containing a reactive amino group in the low-O<sub>2</sub> affinity T conformation of the Hb. These results provide the first experimental evidence that bicarbonate binds directly to crocodilian Hb and promotes O<sub>2</sub> delivery independently of CO<sub>2</sub>. Using the gas-diffusion chamber, we observed similar effects in the Hbs of a phylogenetically diverse set of other caiman, alligator, and crocodile species, suggesting that the unique mode of allosteric regulation by CO<sub>2</sub> and bicarbonate evolved >80-100 million years ago in the common ancestor of crocodilians. Taken together, our results show a tight and unusual linkage between O<sub>2</sub> and CO<sub>2</sub> transport in the blood of crocodilians, where build-up of blood CO<sub>2</sub> and bicarbonate ions during breath-hold diving or digestion facilitates O<sub>2</sub> delivery, while Hb desaturation facilitates CO<sub>2</sub> transport as protein-bound CO<sub>2</sub> and bicarbonate.

## Keywords

Adaptation, oxygen, carbon dioxide, blood, allosteric regulation

## Running head:

Regulation of crocodilian hemoglobin

## Introduction

The oxygenation properties of vertebrate hemoglobins (Hbs) are sensitive to a number of small-molecule effectors present in the red blood cell (RBC), including protons, CO<sub>2</sub>, chloride ions, and organic phosphates. Allosteric regulation of Hb-O<sub>2</sub> affinity by such effectors helps keep blood O<sub>2</sub> supply at balance with tissue O<sub>2</sub> consumption. These effectors bind preferentially to the low-affinity (deoxy) T-state of the Hb tetramer, thereby reducing Hb-O<sub>2</sub> affinity by shifting the T-R equilibrium towards the T quaternary state (Perutz, 1976; Storz, 2019; Weber and Fago, 2004). Hence, increases in blood CO<sub>2</sub> levels (as produced by metabolic activity) cause a reduction in Hb-O<sub>2</sub> affinity, thereby facilitating O<sub>2</sub> unloading to tissues. The underlying mechanism is the reaction of CO<sub>2</sub> with N-terminal amino groups (-NH<sub>2</sub>) of the α- and β-chain subunits of the Hb tetramer (Kilmartin and Rossi-Bernardi, 1971), resulting in the formation of a carbamino product (-NH-COO<sup>-</sup>), which preferentially stabilizes the low-affinity T state of the Hb via interactions with positively-charged amino acid residues. CO<sub>2</sub> also exerts an indirect allosteric effect on Hb-O<sub>2</sub> affinity by reducing RBC pH. Upon entry in the RBC, CO<sub>2</sub> reacts with water to form bicarbonate ions and protons, a reaction catalyzed by the enzyme carbonic anhydrase. Protons bind to Hb and promote O<sub>2</sub> unloading via the Bohr effect, while bicarbonate ions leave the RBC in exchange for chloride ions.

Among vertebrate Hbs, those of crocodilians are reportedly unique in that their O<sub>2</sub>-affinity is allosterically regulated by binding of bicarbonate ions to the Hb protein (Bauer et al., 1981; Perutz et al., 1981). This unusual bicarbonate sensitivity of crocodilian Hb is thought to support aerobic metabolism when blood bicarbonate levels are elevated. This occurs during breath-hold diving (Bautista et al., 2021; Hicks and White, 1992), and during the postprandial 'alkaline tide' where gastric acid secretion causes a pronounced metabolic alkalosis (Busk et al., 2000).

The bicarbonate sensitivity of crocodilian Hbs was first described in the spectacled caiman (*Caiman crocodilus*) (Bauer et al., 1981; Perutz et al., 1981), but the allosteric effect was inferred without direct experimental evidence of bicarbonate binding to Hb. Subsequent studies on Hbs from other crocodilian species documented a direct allosteric effect of CO<sub>2</sub> (Fago et al., 2020; Jensen et al., 1998; Weber et al., 2013), but

the direct contribution of bicarbonate-binding has neither been confirmed in these studies nor quantified. The reason is likely that it is difficult to experimentally distinguish the allosteric effects of CO<sub>2</sub> from those of bicarbonate and protons because at equilibrium all these three compounds are present in solution. Moreover, previous studies (Bauer et al., 1981) used different experimental and buffer conditions and rarely accounted for the potential effect of other anions, such as chloride ions, which are potent allosteric modulators of crocodilian Hb-O<sub>2</sub> affinity (Fago et al., 2020; Storz, 2019; Weber et al., 2017).

Here, we use kinetic and equilibrium approaches at a constant pH and in the absence of chloride ions or organic phosphates to separate the allosteric effects of CO<sub>2</sub> and bicarbonate on crocodilian Hb oxygenation. We provide a detailed functional analysis on the allosteric regulation of the Hb of the spectacled caiman, the same species that was originally studied by Bauer and coworkers (Bauer et al., 1981; Bauer and Jelkmann, 1977; Jelkmann and Bauer, 1980). We also confirm the same mode of allosteric regulation in the Hbs of 13 other caiman, alligator, and crocodile species, indicating that this unique property evolved in the common ancestor of extant crocodilians.

## Materials and Methods

### Animals and blood collection

Approximately 5 ml blood was drawn from the post-occipital sinus into heparinized syringes from three non-anesthetized adult spectacled caimans (*Caiman crocodilus*; Linnaeus 1758; around 1.5 kg each) of undetermined sex. The procedure lasted less than 5 min. Blood was immediately centrifuged at 4°C (5000 g, 5 min) to remove plasma and RBCs were then washed five times in 0.9 % NaCl, 0.5 mM EDTA and stored at -80 °C until further processing. As described previously (Fago et al., 2020), we sampled blood and prepared hemolysates from 13 other crocodilian species (American alligator, *Alligator mississippiensis*, [Duadin, 1802]; Chinese alligator, *A. sinensis*, [Fauvel, 1879]; broad-snouted caiman, *Caiman latirostris* [Duadin, 1802]; yacaré caiman, *C. yacare* [Duadin, 1802]; black caiman, *Melanosuchus niger*, [Spix, 1825]; smooth-fronted

caiman, *Paleosuchus trigonatus*, [Schneider, 1801]; American crocodile, *Crocodylus acutus*, [Cuvier, 1807]; Philippine crocodile, *C. mindorensis* [Schmidt, 1928]; Nile crocodile, *C. niloticus* [Laurenti, 1768]; New Guinea crocodile, *C. novaeguineae* [Schmidt, 1928]; saltwater crocodile, *C. porosus* [Schneider, 1801]; Cuban crocodile, *C. rhombifer* [Cuvier, 1807]; Siamese crocodile, *C. siamensis* [Schneider, 1801]).

All protocols of animal handling and sampling were performed in accordance with the Danish Law for Animal Experimentation and were approved by the Danish Animal Experiments Inspectorate, under permit number 2018-15-0201-01507.

### **Preparation of the hemolysate**

For each individual spectacled caiman (N=3), the hemolysate was prepared by dilution (1:5) of washed RBCs in chloride-free 10 mM HEPES, pH 7.6, 0.5 mM EDTA, and incubated on ice for 30 min. The hemolysate was then centrifuged at 4°C (12000 g, 20 min) to remove cell debris and then passed ('stripped') on a PD-10 desalting column (GE Healthcare) equilibrated with 10 mM HEPES, pH 7.6, 0.5 mM EDTA to remove small molecular weight molecules, including Hb's allosteric effectors. Chloride-free HEPES buffers were used throughout. Absence of chloride in solutions was verified by model 926S Mark II chloride analyzer (Sherwood Scientific Ltd, Cambridge, UK).

### **Discriminating the effects of CO<sub>2</sub> and bicarbonate**

To discriminate between the effect of CO<sub>2</sub> and bicarbonate on Hb oxygenation, we measured the time-course of changes in O<sub>2</sub> saturation of stripped hemolysate and purified Hb (see Hemoglobin purification) after addition and removal of 1% CO<sub>2</sub> gas at a fixed PO<sub>2</sub>. These experiments were performed in the presence and absence of 1 mM acetazolamide, a specific inhibitor of carbonic anhydrase contained in the hemolysate, in order to manipulate the rate of bicarbonate formation from CO<sub>2</sub> (Fago et al., 1999). Experiments were performed at 25°C using a thin-layer modified diffusion chamber technique (Cadiz et al., 2019; Natarajan et al., 2018; Storz et al., 2020; Weber et al., 2017). In brief, 4 µL samples were placed in the temperature-controlled gas diffusion chamber connected to a Cary 60 UV-Vis spectrophotometer equipped with fibre optic probes (Agilent Technologies, CA, USA), and O<sub>2</sub> saturation was determined from the

absorption trace at 415 nm. Discrete values of PO<sub>2</sub> and PCO<sub>2</sub> within the chamber were obtained by mixing O<sub>2</sub> and CO<sub>2</sub> with ultrapure N<sub>2</sub> gas using a programmable Gas Mixing System (GMS – Loligo Systems, Viborg, Denmark), with the gas mixture constantly flowing above the sample surface. The experiments were performed at a fixed PO<sub>2</sub> corresponding approximately to 50% O<sub>2</sub> saturation, under the same conditions as our previous study on crocodilian Hbs (0.3 mM heme, 0.1 M HEPES, pH 7.2, 0.5 mM EDTA) (Fago et al., 2020). Heme concentration of samples was measured spectrophotometrically using published extinction coefficients at 577 and 542 nm (Van Assendelft, 1970).

Throughout this study, the pH of Hb samples equilibrated with the same CO<sub>2</sub> of the experiments was routinely measured using a pH electrode InLab® Micro (Mettler Toledo) and it did not change appreciably (range 7.16-7.21).

### Measuring O<sub>2</sub> equilibrium curves

We measured O<sub>2</sub> equilibrium curves of stripped hemolysate and purified Hb (see Hemoglobin purification) using the same diffusion chamber technique described above at 25 °C under identical buffer conditions (0.3 mM heme, 0.1 M HEPES, pH 7.2, 0.5 mM EDTA). O<sub>2</sub> affinity (P<sub>50</sub>, the PO<sub>2</sub> at 50% O<sub>2</sub> saturation) and Hill's cooperativity coefficient (n) were calculated by non-linear regression fitting the Hill equation (Eq. 1) to the saturation data (Janecka et al., 2015; Jendroszek et al., 2018)

$$\text{Eq. 1)} \quad Y = \frac{P_{O_2}^n}{(P_{O_2}^n + P_{50}^n)}$$

where Y is the O<sub>2</sub> saturation and PO<sub>2</sub> is the O<sub>2</sub> tension.

### Hemoglobin purification and mass spectrometry analysis

Hb was purified from endogenous carbonic anhydrase by gel filtration using fast protein liquid chromatography (FPLC) on an ÄKTA Pure Protein Purification System equipped with a Superdex 75 10/300 GL gel-filtration column and a 100 µL loop (GE Healthcare Life Sciences). Buffer was 10 mM HEPES, pH 7.6, 0.5 mM EDTA, 0.15 M NaCl, and flow rate was 0.5 ml/min. Absorbance was measured at 280 nm. The column was

calibrated with standard proteins (Sigma Aldrich) of known molecular mass: horse myoglobin (17.6 kDa), bovine carbonic anhydrase II (30 kDa) and human adult Hb (64.6 kDa). The Hb fractions purified by gel filtration were concentrated by ultracentrifugation and dialyzed against 10 mM HEPES, pH 7.5, 0.5 mM EDTA to remove NaCl. After dialysis, absence of  $\text{Cl}^-$  in the samples was confirmed by using a MK II Chloride Analyzer 926S (Sherwood Scientific Ltd, Cambridge, UK). Hb fractions were analysed for the presence or absence of intermolecular disulfide bonds by SDS polyacrylamide gel electrophoresis (range 4-12 %) using NuPAGE® Novex® Bis-Tris Pre-Cast Gels and stained with Coomassie blue, in the presence and absence of the reducing agent DTT.

To establish whether carbonic anhydrase (~30 kDa) co-eluted with Hb on FPLC, we ran the purified Hb fractions on a mini-protean precast 4-20% SDS PAGE gel (Bio-Rad, Hercules, CA), which we then stained with Coomassie brilliant blue-G. We conducted tandem mass spectrometry (MS/MS) analyses on the bands ranging from ~25 to 50 kDa in size (Fig.S3). The stained bands were excised and processed for in-gel tryptic digestion (Shevchenko et al., 2006) and the eluted peptides were then analyzed using a Thermo Orbitrap Fusion Lumos Tribrid (Thermo Scientific™) mass spectrometer in data-dependent acquisition mode. Peptides were identified by searching MS/MS data against the UniprotKB/Swiss-Prot database. The search was set up for full tryptic peptides with a maximum of two missed cleavage sites. The precursor mass tolerance threshold was set as 10 ppm and maximum fragment mass error was set at 0.02 Da. Qualitative analysis was performed using PEAKS X software. The significance threshold of the ion score was calculated based on a false discovery rate of  $\leq 1\%$ .

### **CO<sub>2</sub> effect on O<sub>2</sub> affinity and CO<sub>2</sub> saturation curves**

To establish whether the purified Hb fractions had different sensitivity to CO<sub>2</sub>, we determined O<sub>2</sub> equilibrium curves for each Hb fraction at 25 °C (0.3 mM heme, 0.1 M HEPES, pH 7.2, 0.5 mM EDTA) at discrete CO<sub>2</sub> tensions in the gas mixture, and calculated P<sub>50</sub> and n at each PCO<sub>2</sub> as described above (see Measuring O<sub>2</sub> equilibrium curves).



For each purified Hb fraction, we determined apparent CO<sub>2</sub> saturation curves by measuring the decrease in the O<sub>2</sub> saturation upon addition of CO<sub>2</sub> in the gas mixture, while keeping a fixed PO<sub>2</sub> (approximately corresponding to the P<sub>50</sub> of that Hb fraction in the absence of CO<sub>2</sub>). A new Hb sample (4 µL) was used for measurements at each given PCO<sub>2</sub>. Experiments were performed using the modified diffusion chamber technique at 25 °C, 0.3 mM heme, 0.1 M HEPES, pH 7.2, 0.5 mM EDTA. Apparent CO<sub>2</sub> saturation curves for each purified Hb were obtained by non-linear regression fitting of a single hyperbola (Eq. 2) to the data

$$\text{Eq. 2)} \quad Y = \frac{SO_{2\min}}{(X+K_{CO_2})}$$

where Y is O<sub>2</sub> saturation, SO<sub>2min</sub> is the O<sub>2</sub> saturation at saturating PCO<sub>2</sub> values (plateau) and X is PCO<sub>2</sub>. This analysis provided the apparent affinity constant for the allosteric binding of CO<sub>2</sub> to the Hb (K<sub>CO<sub>2</sub></sub>, the PCO<sub>2</sub> at half-CO<sub>2</sub> saturation). We also examined the possibility of two binding sites by fitting a double hyperbola equation to the data (see Supplementary material Table S1).

### **Bicarbonate effect on O<sub>2</sub> release and bicarbonate saturation curves**

To determine the effect of bicarbonate on Hb oxygenation, we equilibrated samples of each purified Hb fraction (0.05 mM heme, 0.1 M HEPES buffer pH 7.2, 0.5 mM EDTA) in Eschweiler tonometers for at least 40 min at 25°C with a gas mixture of 2% air and 98% N<sub>2</sub> generated by a gas mixing pump (Wösthoff, Bochum, Germany). The same gas mixture (corresponding to a PO<sub>2</sub> close to the P<sub>50</sub> of the Hb) was also used to equilibrate a freshly prepared stock solution of sodium bicarbonate (NaHCO<sub>3</sub>) dissolved in MilliQ H<sub>2</sub>O in a separate tonometer at the same temperature. After equilibration, the Hb sample was transferred with a gastight syringe into a 2.5 ml Tucker chamber (Tucker, 1967), previously flushed with 2% air and 98% N<sub>2</sub>. The chamber was equipped with a fibre optic O<sub>2</sub> probe connected to a FireStingO2 (FSO2-1) oxygen and temperature meter and controlled by FireSting logger V.2.365 software for PO<sub>2</sub> signal recording (PyroScience, Germany). Following stabilization of the PO<sub>2</sub> signal of the Hb sample in the chamber, a small volume (< 60 µL) of the NaHCO<sub>3</sub> solution was injected into the Tucker chamber to achieve discrete NaHCO<sub>3</sub> concentrations (2, 4, 7.7, 15.4, 23.1 and



30 mM), and the subsequent increase in PO<sub>2</sub> in the chamber (due to bicarbonate-induced O<sub>2</sub> unloading by the Hb) was recorded. The bicarbonate concentrations of the stock solutions were 0.5, 1, 1.2, or 1.3 M, chosen based on the desired final concentration within the chamber, to maintain a similar injection volume (< 60 µl) in all samples. A new Hb sample was used for each bicarbonate addition and separate experiments were performed for the Hb fractions of each of the three individuals. Two-point calibration of the oxygen probe was performed immediately before recording each trace by flushing the chamber with water-saturated air or N<sub>2</sub> and taking into accounts the barometric pressure on the day. The pH of the bicarbonate-containing Hb solution was measured at the end of each experiment using a Mettler Toledo pH electrode InLab® Micro and no significant change was observed (range 7.19-7.23).

Apparent bicarbonate saturation curves for each purified Hb were obtained by non-linear regression fitting of a single hyperbola (Eq. 3) to the data

$$\text{Eq. 3)} \quad Y = \frac{\Delta PO_2 \max}{(X + K_{bic})}$$

where Y is ΔPO<sub>2</sub>, ΔPO<sub>2</sub>max is the ΔPO<sub>2</sub> at saturating bicarbonate concentrations (plateau) and X is [NaHCO<sub>3</sub>] in mM. This analysis provided the apparent affinity constant for the allosteric binding of bicarbonate to the Hb (K<sub>bic</sub>, the bicarbonate concentration at half-bicarbonate saturation).

## Statistical analysis

Statistical analysis and curve fitting were performed using SigmaPlot version 12 (SigmaStat) and Prism V.8 (GraphPad). The obtained parameters SO<sub>2min</sub> and K<sub>CO2</sub> were statistically compared by two-way ANOVA considering CO<sub>2</sub> and Hb fraction as factors. The K<sub>CO2</sub> values obtained for the Hb fractions were statistically compared by a t-test analysis. Similarly, the ΔPO<sub>2</sub>max and K<sub>bic</sub> values obtained for the Hb fractions were statistically compared by t-test. Statistical significance was considered at α < 0.05. Data is presented as mean ± s.e.m unless otherwise stated.

## Results and Discussion

### Reversible effects of CO<sub>2</sub> on hemolysate oxygenation

To investigate the mode of allosteric regulation of crocodilian Hb, we first tested whether the CO<sub>2</sub> effect on Hb-O<sub>2</sub> saturation could be attributed exclusively to bicarbonate, as originally proposed by Bauer and coworkers (Bauer et al., 1981). In these experiments, we used hemolysates of spectacled caiman (N=3 individuals) and 13 other crocodilian species representing the two most speciose families, Alligatoridae and Crocodylidae, which together capture the deepest evolutionary split among all living crocodilians. We used a kinetic approach that we originally developed to unravel the allosteric effect of bicarbonate in hagfish Hb, which is insensitive to CO<sub>2</sub> (Fago et al., 1999). This method takes advantage of active endogenous carbonic anhydrase in the hemolysate to rapidly convert added CO<sub>2</sub> to bicarbonate, as well as the carbonic anhydrase inhibitor acetazolamide to specifically inhibit this fast enzymatic reaction. Thus, upon addition of acetazolamide, a slower effect of CO<sub>2</sub> on O<sub>2</sub> saturation indicates that CO<sub>2</sub> must convert to bicarbonate (via the slow non-catalysed reaction) to be able to affect oxygenation and that bicarbonate – not CO<sub>2</sub> – is the true allosteric effector (Fago et al., 1999). As shown in Figure 1, at a fixed PO<sub>2</sub> (yielding ~50% O<sub>2</sub> saturation), addition of 1% CO<sub>2</sub> in the gas mixture caused a rapid and strong decrease in the O<sub>2</sub> saturation down to ~10 % in the stripped hemolysate of spectacled caiman (Fig. 1A). We also observed the same response in the hemolysates of other crocodilian species (Fig. S1). This CO<sub>2</sub>-mediated decrease in O<sub>2</sub> saturation was fully reversible, and 50% saturation was restored when CO<sub>2</sub> was removed from the gas mixture (Fig. 1A). The decrease in O<sub>2</sub> saturation was equally fast when carbonic anhydrase present in the hemolysate was inhibited by acetazolamide (Fig. 1B, Fig S1). This result indicates that CO<sub>2</sub> binds to the Hb directly without being converted to bicarbonate and that CO<sub>2</sub> is a potent allosteric effector of crocodilian Hbs in its own right. This is not consistent with results reported by Bauer and coworkers, which were obtained under different experimental conditions, perhaps due to the use of chloride-containing solutions (Bauer et al., 1981). Also, the fact that the decrease in O<sub>2</sub> saturation was of the same magnitude in the presence and absence of

acetazolamide (Fig. 1, Fig.S1) indicates that there is no additional binding of bicarbonate (which would form rapidly without acetazolamide) elsewhere on the protein. Thus, the proposed allosteric effect of bicarbonate must occur via binding of bicarbonate to the same protein site as CO<sub>2</sub>.

The fact that the recovery to ~50% O<sub>2</sub> saturation upon removal of CO<sub>2</sub> was slower when carbonic anhydrase was inhibited (Fig. 1, Fig. S1) could indicate that carbonic anhydrase was somehow involved in the dissociation of Hb-bound CO<sub>2</sub>. The addition of bovine carbonic anhydrase II to spectacled caiman hemolysate produced similar traces as those of Figure 1 (Fig. S2), indicating that endogenous carbonic anhydrase was indeed present in the hemolysate.

### **Functionally identical Hb fractions differing in molecular mass**

In order to determine whether endogenous carbonic anhydrase was involved in the reversibility of CO<sub>2</sub>-mediated responses on Hb oxygenation, we passed spectacled caiman hemolysate through a gel-filtration column to remove carbonic anhydrase. Spectacled caiman expresses a single adult Hb isoform (Jelkmann and Bauer, 1980), similar to all other crocodilians examined (Fago et al., 2020; Hoffmann et al., 2018). Results from gel filtration showed differences in the apparent molecular mass of the Hb, with part of the Hb assembled into a higher-order aggregate – presumably an octamer – with an apparent mass of 95.7 kDa, while most Hb was present as a regular tetramer (Fig. 2A, B), as also reported earlier in the same species (Bauer and Jelkmann, 1977). We named these Hb fractions Hb1 and Hb2, respectively. Analysis of Hb1 and Hb2 by SDS-PAGE under reducing (Fig. 2C) and non-reducing conditions (Fig. S3) showed identical patterns and intensity of bands indicating that high-order aggregates are not formed via disulfide bonds as in the Hb aggregates of other crocodilians (Weber et al., 2013) and non-avian reptiles (Petersen et al., 2017; Storz et al., 2015).

SDS-PAGE of Hb1 and Hb2 revealed not only the α- and β-type Hb chains, but also less intense bands of higher molecular mass that could correspond to carbonic anhydrase, having a molecular mass of 30 kDa (Fig. 2C). The identity of these bands, corresponding to a size range of ~25 to 50 kDa, was established by mass spectrometry.

The ~30 kDa band corresponds to stable intact heterodimers (Hb  $\alpha$  and  $\beta$ -chains), possibly associated with aggregate formation of the Hb, and the ~42 kDa band corresponds to actin protein. Thus, carbonic anhydrase was effectively removed from both Hb1 and Hb2.

As a next step, we investigated the reversibility of CO<sub>2</sub> binding on O<sub>2</sub> saturation for the purified Hb1 and Hb2 fractions in the absence and presence of acetazolamide (Fig. S4). As for the hemolysate (Fig. 1), return to the original O<sub>2</sub> saturation upon removal of CO<sub>2</sub> was slower in the presence of acetazolamide. This result suggests that acetazolamide somehow interferes with Hb-CO<sub>2</sub> dissociation, but not with Hb-CO<sub>2</sub> binding.

To establish whether purified Hb1 and Hb2 had different O<sub>2</sub> binding affinities and CO<sub>2</sub> sensitivities, we measured O<sub>2</sub> equilibrium curves under identical buffer conditions at different PCO<sub>2</sub> values. These experiments yielded identical P<sub>50</sub> at a range of PCO<sub>2</sub> values for both Hb fractions (Fig. 2D) and highly similar cooperativity coefficients (Fig. S5), indicating that assembly of the Hb into higher-order aggregates did not alter oxygenation properties and CO<sub>2</sub> sensitivities.

### **CO<sub>2</sub> apparent binding curves and affinity of Hb fractions**

We used the diffusion chamber technique to determine the apparent affinity for CO<sub>2</sub> of the purified Hb1 and Hb2 fractions (Fig. 3A-C). These experiments measured the decrease in O<sub>2</sub> saturation at different PCO<sub>2</sub> values, while maintaining a fixed PO<sub>2</sub> roughly corresponding to the P<sub>50</sub> of each Hb measured in the absence of CO<sub>2</sub> (Fig. 3A). The Hb1 and Hb2 fractions exhibited identical changes in O<sub>2</sub> saturations upon additions of CO<sub>2</sub> (two-way ANOVA,  $P = 0.543$ ), and data were therefore pooled. These data showed a single hyperbolic relationship (Fig. 3B,C), indicating the presence of a single type of binding site for CO<sub>2</sub> in each Hb with apparent affinities (expressed as PCO<sub>2</sub>) corresponding to  $1.48 \pm 0.22$  and  $1.32 \pm 0.15$  torr for Hb1 and Hb2, respectively, that were not significantly different from each other (t-test,  $P = 0.570$ ). The use of a double hyperbola equation did not narrow the confidence interval of the fitted parameters (Table S1), so the data support the existence of a single binding site for CO<sub>2</sub>. For each Hb fraction, the apparent affinity for CO<sub>2</sub> is well below PCO<sub>2</sub> values reported for

crocodilian blood of ~29-36 torr during digestion (Busk et al., 2000), and 16.8 torr at rest and 26.7 torr during diving (Bautista et al., 2021), suggesting that crocodilian Hb would be largely saturated with CO<sub>2</sub> under physiological conditions.

### **Bicarbonate apparent binding curves and affinities of Hb fractions**

The results of Figure 1 suggest that bicarbonate may allosterically bind to the same protein site as CO<sub>2</sub>. To confirm experimentally the direct allosteric effect of bicarbonate, we used purified Hb1 and Hb2 fractions of spectacled caiman in a Tucker chamber in the absence of CO<sub>2</sub>. In these experiments, we kept the Hb solution at a fixed PO<sub>2</sub> (approximately corresponding to the P<sub>50</sub>) and measured the increase in PO<sub>2</sub> following the injection of a measured small volume of bicarbonate stock solution (Fig. 3D-F). The results of these experiments show that bicarbonate had a dose-dependent effect on the O<sub>2</sub> released from the Hb following a simple hyperbolic function, indicating the existence of a single type of allosteric binding site. Injections of bicarbonate solutions in buffer did not increase PO<sub>2</sub> in the chamber (Fig. 3D). From the bicarbonate binding curves, the apparent bicarbonate affinities were  $3.31 \pm 0.35$  and  $2.48 \pm 0.16$  mM for Hb1 and Hb2, respectively (Table S2), which are not significantly different from each other ( $P = 0.094$ ). These values are below the range of bicarbonate concentrations measured in crocodilian arterial blood of ~24-36 mM (from resting to digesting) (Busk et al., 2000; Jensen et al., 1998) and 11.4 mM at rest and 16.8 mM during diving in erythrocytes (Bautista et al., 2021), suggesting that crocodilian Hb is fully saturated with bicarbonate under physiological conditions. These results provide the first experimental evidence that bicarbonate binds directly to crocodilian Hb and promotes O<sub>2</sub> delivery, independently of CO<sub>2</sub>.

Interestingly, the affinity for bicarbonate of spectacled caiman Hb in the deoxy state reported by Bauer and coworkers (Bauer et al., 1981) was ~0.7 mM, close to our estimated values at the same pH and temperature.

### **A structural model for CO<sub>2</sub> and bicarbonate allosteric binding**

In analogy with other Hbs, we propose that CO<sub>2</sub> chemically binds to the crocodilian Hb protein to form a carbamino compound (-NH-COO<sup>-</sup>) at a non-protonated amino group (-

NH<sub>2</sub>) (see reaction scheme in Fig. 4A). The negatively charged carbamino group would then be stabilized by nearby positively charged amino acid residues on a specific T-state binding site (Fig. 4B), thereby causing a decrease in O<sub>2</sub> affinity. Since pH does not change upon addition of CO<sub>2</sub>, as reported here and earlier (Jensen et al., 1998), the proton generated in carbamino formation (Fig. 4A) is picked up by the protein molecule, likely contributing to further electrostatic stabilization of the negative carbamino derivative. We note that there is very little structural difference between covalent CO<sub>2</sub> binding via carbamino formation and non-covalent bicarbonate binding to the Hb protein (Fig. 4B), consistent with the inference from our results (Fig. 1) that both allosteric effectors bind to the same site.

As also concluded in previous studies (Bauer et al., 1981; Perutz et al., 1981), our results (Fig. 3) and the two-fold symmetry of the tetrameric Hb molecule indicate the existence of two identical binding sites for CO<sub>2</sub> and bicarbonate per tetramer in the T state of crocodilian Hb, each including a reactive non-protonated amino group close to positively charged residues. Carbamino formation in human Hb occurs at the  $\alpha$  and  $\beta$  subunit N-termini (Bauer and Schröder, 1972; Kilmartin and Rossi-Bernardi, 1971; Perrella et al., 1975), but in crocodilian Hbs, these groups are acetylated to a variable extent without affecting the strong sensitivity to CO<sub>2</sub> (Fago et al., 2020; Natarajan et al., 2020). In the original structural model proposed by Perutz and coworkers (Perutz et al., 1981) two bicarbonate ions bind two identical sites lining the central cavity of T-state crocodilian Hb, where organic phosphates normally bind: Lys82 $\beta$ , Glu144 $\beta$ , and the N-terminus of the  $\alpha$  subunit. However, the smooth-fronted caiman (*Paleosuchus trigonatus*) possesses Gln at 82 $\beta$  rather than positively charged Lys (Fago et al 2020), and yet the Hb of this species exhibits the same CO<sub>2</sub>/bicarbonate effect as that of other crocodilians (Fig. S1). Moreover, acetylation of the  $\alpha$ -chain N-termini of crocodilian Hbs does not appear to affect CO<sub>2</sub> sensitivity (Natarajan et al. 2020). Based on site-directed mutagenesis of recombinant human Hb, other studies (Komiyama et al., 1996; Komiyama et al., 1995) have proposed a more complex mechanism, involving numerous residues at the  $\alpha_1\beta_2$  interface of the Hb tetramer, in particular, Lys38 $\beta$ , which is present in all crocodilian Hbs. Molecular modeling has revealed numerous positively charged residues in the central cavity of alligator Hb, including Arg135 $\beta$  involved in



several interactions (Fago et al., 2020). In the vicinity of other positively charged residues, the amino group of Lys or Arg side chains, which normally have high pKa values and are protonated, would be largely in the non-protonated form at physiological pH values and would therefore be available for carbamino formation. Mutagenesis studies using recombinant crocodile Hb, rather human Hb, are underway in our lab to test these possibilities. Although the residues involved remain to be identified, it appears from our study that there is great diversity among chordate Hbs in the allosteric control of Hb function by CO<sub>2</sub> and bicarbonate, with Hbs sensitive to only CO<sub>2</sub> (e.g. human Hb), only bicarbonate (hagfish), or both in combination (crocodile).

## Conclusions

Our results indicate that the O<sub>2</sub>-affinity of crocodilian Hb is strongly modulated by allosteric binding of both CO<sub>2</sub> and bicarbonate. Both effectors bind with high affinity at the same positively charged site located in the T-state and involving a reactive amino group, possibly the side chain of Lys38β, on each half-tetramer. Thus, it appears that the evolution of a particularly strong allosteric effect of CO<sub>2</sub> in crocodilian Hbs would make these Hbs also sensitive to bicarbonate ions, whereas bicarbonate sensitivity apparently does not necessarily imply CO<sub>2</sub> sensitivity, as it is the case for hagfish Hbs. Physiologically, the strong Hb sensitivities to CO<sub>2</sub> and bicarbonate provides the basis for a unique linkage between O<sub>2</sub> and CO<sub>2</sub> transport in the blood of crocodilians, where build-up of CO<sub>2</sub> and bicarbonate ions during breath-hold diving or digestion facilitates O<sub>2</sub> delivery to tissues to sustain aerobic metabolism. At the same time, Hb desaturation facilitates CO<sub>2</sub> transport in the blood as protein-bound CO<sub>2</sub> and bicarbonate. Corroborating these conclusions, a recent study on caiman blood reports increase in protein-bound CO<sub>2</sub> and bicarbonate during diving, with bicarbonate binding progressively increasing upon Hb deoxygenation (Bautista et al., 2021). These distinct effects of CO<sub>2</sub> and bicarbonate on Hb-O<sub>2</sub> affinity are shared by a phylogenetically diverse set of caiman, alligator, and crocodile species, indicating that these unique regulatory properties evolved prior to the diversification of extant crocodilians >80-100 million years ago in the late Cretaceous, but after the stem lineage of crocodilians diverged from the ancestors of dinosaurs and modern birds.



## **Ethical statement**

All protocols of animal handling and sampling were performed in accordance with the Danish Law for Animal Experimentation and were approved by the Danish Animal Experiments Inspectorate, under permit number 2018-15-0201-01507.

## **Competing Interest Statement:**

The authors declare no conflict of interest, financial or otherwise.

## **Funding**

This research was supported by funding from the National Institutes of Health (HL087216) (J.F.S. and A.F.), the National Science Foundation (OIA-1736249) (J.F.S.), and the Independent Research Fund Denmark (T.W. and H.M.).

## **Acknowledgments**

We thank Elin E. Petersen and Marie Skou Pedersen, for their technical assistance. We also would like to thank Rene Hedegaard and the staff from the Krokodille Zoo (Eskilstrup, Denmark) for assistance in blood sampling. We also thank Vikas Kumar (Mass Spectrometry and Proteomics Core Facility, University of Nebraska Medical Center) for assistance with the MS/MS data analysis.

## **References**

- Bauer, C., Forster, M., Gros, G., Mosca, A., Perrella, M., Rollema, H.S., Vogel, D., 1981. Analysis of bicarbonate binding to crocodilian hemoglobin. *Journal of Biological chemistry* 256, 8429-8435.
- Bauer, C., Jelkmann, W., 1977. Carbon dioxide governs the oxygen affinity of crocodile blood. *Nature* 269, 825-827.
- Bauer, C., Schröder, E., 1972. Carbamino compounds of haemoglobin in human adult and foetal blood. *The Journal of physiology* 227, 457-471.
- Bautista, N., Damsgaard, C., Fago, A., Wang, T., 2021. Carbon dioxide and bicarbonate accumulation in caiman erythrocytes during diving. *Journal of Experimental Biology*. Accepted manuscript.

Busk, M., Overgaard, J., Hicks, J.W., Bennett, A.F., Wang, T., 2000. Effects of feeding on arterial blood gases in the American alligator *Alligator mississippiensis*. *Journal of Experimental Biology* 203, 3117.

Cadiz, L., Bundgaard, A., Malte, H., Fago, A., 2019. Hypoxia enhances blood O<sub>2</sub> affinity and depresses skeletal muscle O<sub>2</sub> consumption in zebrafish (*Danio rerio*). *Comparative Biochemistry and Physiology Part B: Biochemistry and Molecular Biology* 234, 18-25.

Fago, A., Malte, H., Dohn, N., 1999. Bicarbonate binding to hemoglobin links oxygen and carbon dioxide transport in hagfish. *Respiration Physiology* 115, 309-315.

Fago, A., Natarajan, C., Pettinati, M., Hoffmann, F.G., Wang, T., Weber, R.E., Drusin, S.I., Issoglio, F., Martí, M.A., Estrin, D., Storz, J.F., 2020. Structure and function of crocodilian hemoglobins and allosteric regulation by chloride, ATP, and CO<sub>2</sub>. *American Journal of Physiology-Regulatory, Integrative and Comparative Physiology* 318, R657-R667.

Hicks, J.W., White, F.N., 1992. Pulmonary gas exchange during intermittent ventilation in the American alligator.

Hoffmann, F.G., Vandewege, M.W., Storz, J.F., Opazo, J.C., 2018. Gene Turnover and Diversification of the  $\alpha$ - and  $\beta$ -Globin Gene Families in Sauropsid Vertebrates. *Genome Biology and Evolution* 10, 344-358.

Janecka, J.E., Nielsen, S.S.E., Andersen, S.D., Hoffmann, F.G., Weber, R.E., Anderson, T., Storz, J.F., Fago, A., 2015. Genetically based low oxygen affinities of felid hemoglobins: lack of biochemical adaptation to high-altitude hypoxia in the snow leopard. *The Journal of Experimental Biology* 218, 2402.

Jelkmann, W., Bauer, C., 1980. Oxygen binding properties of caiman blood in the absence and presence of carbon dioxide. *Comparative Biochemistry and Physiology Part A: Physiology* 65, 331-336.

Jendroszek, A., Malte, H., Overgaard, C.B., Beedholm, K., Natarajan, C., Weber, R.E., Storz, J.F., Fago, A., 2018. Allosteric mechanisms underlying the adaptive increase in hemoglobin-oxygen affinity of the bar-headed goose. *The Journal of Experimental Biology* 221, jeb185470.

Jensen, F.B., Wang, T., Jones, D.R., Brahm, J., 1998. Carbon dioxide transport in alligator blood and its erythrocyte permeability to anions and water. *American Journal of Physiology-Regulatory, Integrative and Comparative Physiology* 274, R661-R671.

Kilmartin, J.V., Rossi-Bernardi, L., 1971. The binding of carbon dioxide by horse haemoglobin. *Biochem J* 124, 31-45.

Komiyama, N., Tame, J., Nagai, K., 1996. A hemoglobin-based blood substitute: transplanting a novel allosteric effect of crocodile Hb. *Biol Chem* 377, 543-548.

Komiyama, N.H., Miyazaki, G., Tame, J., Nagai, K., 1995. Transplanting a unique allosteric effect from crocodile into human haemoglobin. *Nature* 373, 244-246.

Natarajan, C., Jendroszek, A., Kumar, A., Weber, R.E., Tame, J.R.H., Fago, A., Storz, J.F., 2018. Molecular basis of hemoglobin adaptation in the high-flying bar-headed goose. *PLOS Genetics* 14, e1007331.

Natarajan, C., Signore, A.V., Kumar, V., Weber, R.E., Fago, A., Storz, J.F., 2020. Effect of NH<sub>2</sub>-terminal acetylation on the oxygenation properties of vertebrate haemoglobin. *Biochemical Journal* 477, 3839-3850.

- Perrella, M., Bresciani, D., Rossi-Bernardi, L., 1975. The binding of CO<sub>2</sub> to human hemoglobin. *Journal of Biological Chemistry* 250, 5413-5418.
- Perutz, M.F., 1976. Structure and Mechanisms of Haemoglobin. *British Medical Bulletin* 32, 195-208.
- Perutz, M.F., Bauer, C., Gros, G., Leclercq, F., Vandecasserie, C., Schnek, A.G., Braunitzer, G., Friday, A.E., Joysey, K.A., 1981. Allosteric regulation of crocodilian haemoglobin. *Nature* 291, 682-684.
- Petersen, A.G., Petersen, S.V., Frische, S., Drakulic, S., Golas, M.M., Sander, B., Fago, A., 2017. Hemoglobin polymerization via disulfide bond formation in the hypoxia-tolerant turtle *Trachemys scripta*: implications for antioxidant defense and O<sub>2</sub> transport. *American Journal of Physiology-Regulatory, Integrative and Comparative Physiology* 314, R84-R93.
- Shevchenko, A., Tomas, H., Havli, J., Olsen, J.V., Mann, M., 2006. In-gel digestion for mass spectrometric characterization of proteins and proteomes. *Nature Protocols* 1, 2856-2860.
- Storz, J.F., 2019. Hemoglobin: insights into protein structure, function, and evolution. Oxford University Press.
- Storz, J.F., Natarajan, C., Grouleff, M.K., Vandewege, M., Hoffmann, F.G., You, X., Venkatesh, B., Fago, A., 2020. Oxygenation properties of hemoglobin and the evolutionary origins of isoform multiplicity in an amphibious air-breathing fish, the blue-spotted mudskipper (*Boleophthalmus pectinirostris*). *The Journal of Experimental Biology* 223, jeb217307.
- Storz, J.F., Natarajan, C., Moriyama, H., Hoffmann, F.G., Wang, T., Fago, A., Malte, H., Overgaard, J., Weber, R.E., 2015. Oxygenation properties and isoform diversity of snake hemoglobins. *American Journal of Physiology-Regulatory, Integrative and Comparative Physiology* 309, R1178-R1191.
- Tucker, V.A., 1967. Method for oxygen content and dissociation curves on microliter blood samples. *Journal of Applied Physiology* 23.
- Van Assendelft, O.W., 1970. Spectrophotometry of Haemoglobin Derivatives, Royal Vangorcum Ltd. Assen, The Netherlands.
- Weber, R.E., Fago, A., 2004. Functional adaptation and its molecular basis in vertebrate hemoglobins, neuroglobins and cytoglobins. *Respiratory Physiology & Neurobiology* 144, 141-159.
- Weber, R.E., Fago, A., Malte, H., Storz, J.F., Gorr, T.A., 2013. Lack of conventional oxygen-linked proton and anion binding sites does not impair allosteric regulation of oxygen binding in dwarf caiman hemoglobin. *American Journal of Physiology-Regulatory, Integrative and Comparative Physiology* 305, R300-R312.
- Weber, R.E., Jarvis, J.U.M., Fago, A., Bennett, N.C., 2017. O<sub>2</sub> binding and CO<sub>2</sub> sensitivity in haemoglobins of subterranean African mole rats. *The Journal of Experimental Biology* 220, 3939.

## Figure legends

**Figure 1.** Reversibility of CO<sub>2</sub> effect on O<sub>2</sub> saturation in the hemolysate of the spectacled caiman. Representative traces in the absence **A)** and presence **B)** of acetazolamide (ACZ) monitored by the diffusion chamber technique. After equilibration with 100% O<sub>2</sub> (100% O<sub>2</sub> saturation) and 100% N<sub>2</sub> (0% O<sub>2</sub> saturation), the hemolysate was equilibrated with 0.44% O<sub>2</sub> to achieve approximately 50% O<sub>2</sub> saturation before equilibration with 1% CO<sub>2</sub>, 0.44% O<sub>2</sub>, as highlighted by the shaded area. Changes in the % gas in the mixture are indicated by arrows. Traces are representative of N=3 biological replicates.

**Figure 2.** FPLC purification, SDS-PAGE and functional analysis of Hb fractions of spectacled caiman. **A)** Elution profile of caiman hemolysate (representative of N=3 biological replicates), resolving in two peaks (Hb1 and Hb2) indicated by arrows, is shown superimposed to that of standard proteins with known molecular mass human Hb (64.6 KDa), horse myoglobin (Mb, 17.6 KDa) and bovine carbonic anhydrase II (CA, 30 KDa). **B)** Calibration curve by regression analysis. **C)** SDS PAGE under reducing conditions (DTT 10 mM) of (lanes from left to right) bovine CA II, spectacled caiman hemolysate, purified Hb1, purified Hb2 and standard protein (STD) as indicated. The bands corresponding to  $\alpha$  and  $\beta$ -type chains in the hemolysate and in the two purified Hb fractions are indicated. **D)** logP<sub>50</sub> measured at various PCO<sub>2</sub> values, showing identical effect of CO<sub>2</sub> on the O<sub>2</sub> affinity of purified Hb1 and Hb2 fractions (N=3).

**Figure 3.** Effect of CO<sub>2</sub> and bicarbonate on the O<sub>2</sub> saturation of purified Hb1 and Hb2 from spectacled caiman and apparent CO<sub>2</sub> and bicarbonate binding curves. **A)** Representative traces measured using the thin-layer diffusion chamber of the different decreases in Hb saturation induced by changes in PCO<sub>2</sub> at a fixed PO<sub>2</sub> close to P<sub>50</sub> of 0.44 % O<sub>2</sub> (PO<sub>2</sub> ~3.3 Torr). Apparent CO<sub>2</sub> saturation curves of **B)** Hb1 and **C)** Hb2 purified from 3 individuals obtained as shown in panel **A)**. Non-linear regression fitting of a single hyperbola equation is shown (details and fitted parameters are in Supplementary material Table S1). **D)** Representative traces showing the increase in O<sub>2</sub> released from Hb1 (dark blue) and Hb2 (light blue) upon injection of bicarbonate at a

fixed  $PO_2$  of ~4.2 torr. The gray line represents a control trace in which bicarbonate was added to buffer alone. Apparent bicarbonate saturation curves of **E)** Hb1 and **F)** Hb2 obtained as shown in panel **D)**. Non-linear regression fitting of a single hyperbola is shown (details and fitted parameters are in Supplementary material Table S2).

**Figure 4.** Proposed mechanistic model of the observed  $CO_2$  and bicarbonate dependent changes in Hb oxygenation in crocodilians. **A)** General scheme of carbamino protein derivative formation ( $R-NH-COO^-$ ) at a non-protonated amino group ( $R-NH_2$ ) from  $CO_2$ . **B)** Identical putative binding site for  $CO_2$  (top) and bicarbonate (bottom) on the T-state of crocodilian Hb, including a reactive uncharged amino group surrounded by positively charged residues (indicated by the half circle). The negatively charged carbamino formed at the amino group (top) is stabilized by the positively charged amino acid residues, stabilizing the T state and causing a decrease in  $O_2$  saturation. The proton generated in carbamino formation is picked up by the protein molecule, likely contributing to further electrostatic stabilization of the carbamino. Note the very little structural difference between covalent  $CO_2$  binding via carbamino formation (top) and non-covalent bicarbonate binding (bottom) to the protein.

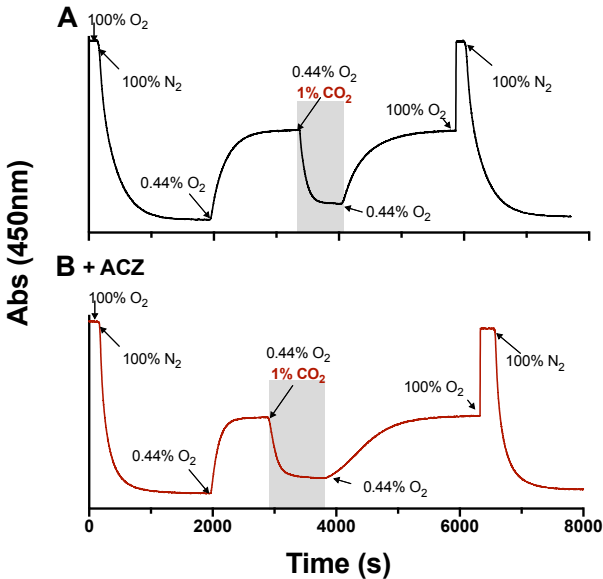

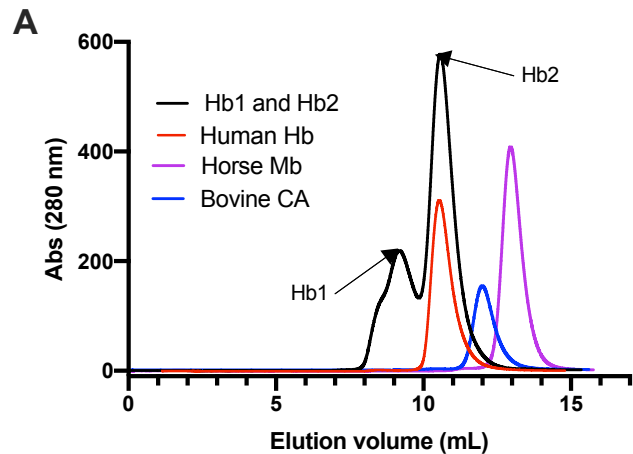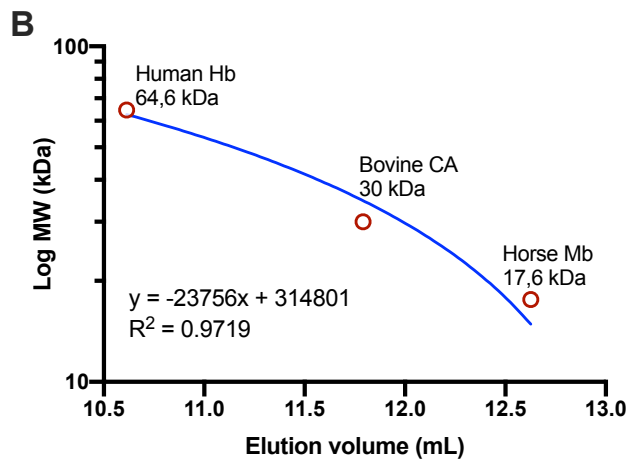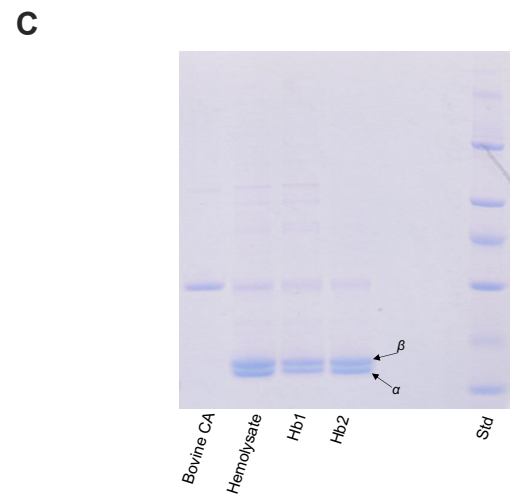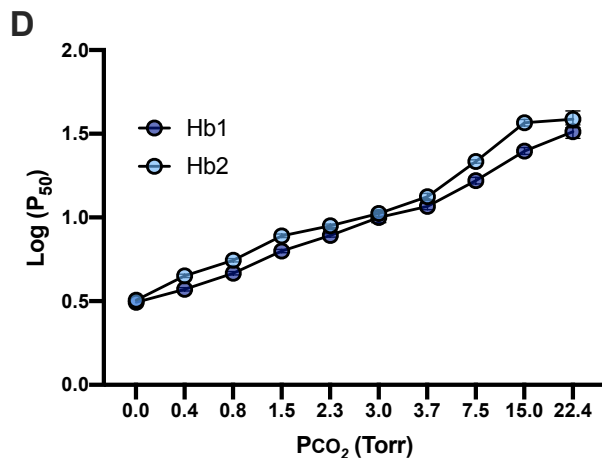



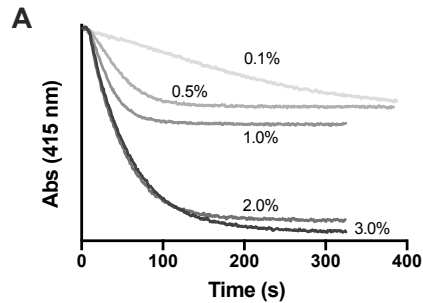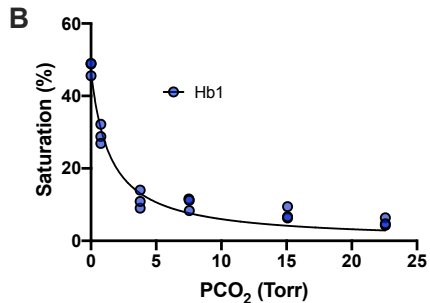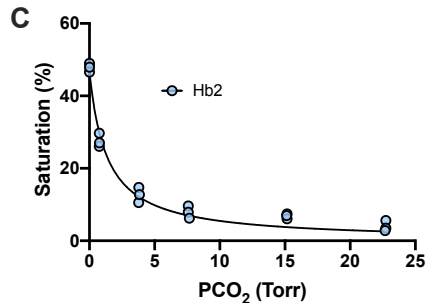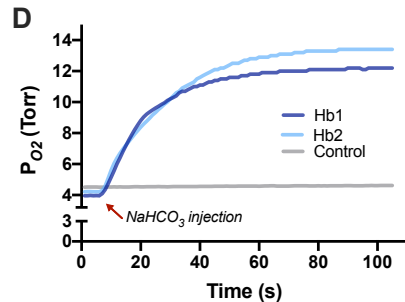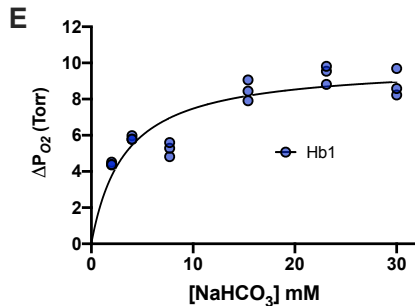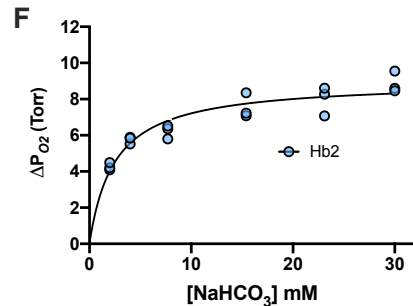

A

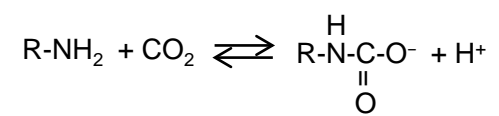

B

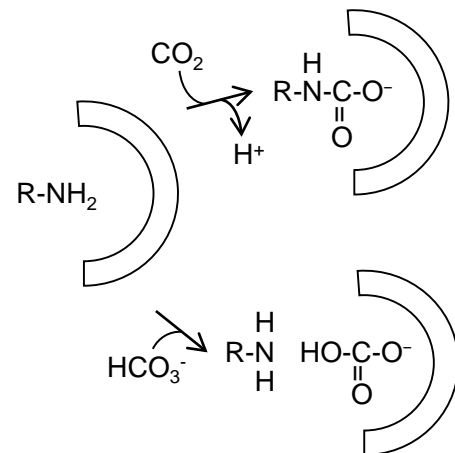

Source: https://www.biorxiv.org/content/10.1101/2021.03.22.436447v1.full.pdf
